# Supplementary material
Source: Springer Nature journal article supplement (https://www.springermedizin.de/resource/supplementary/13058_2010_2871_MOESM11_ESM.pdf/9702780)

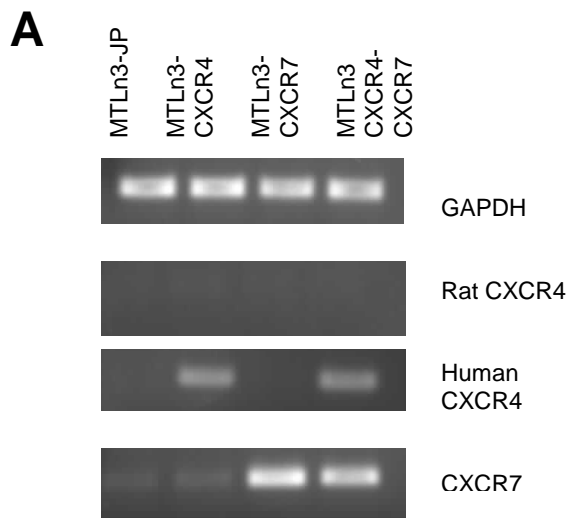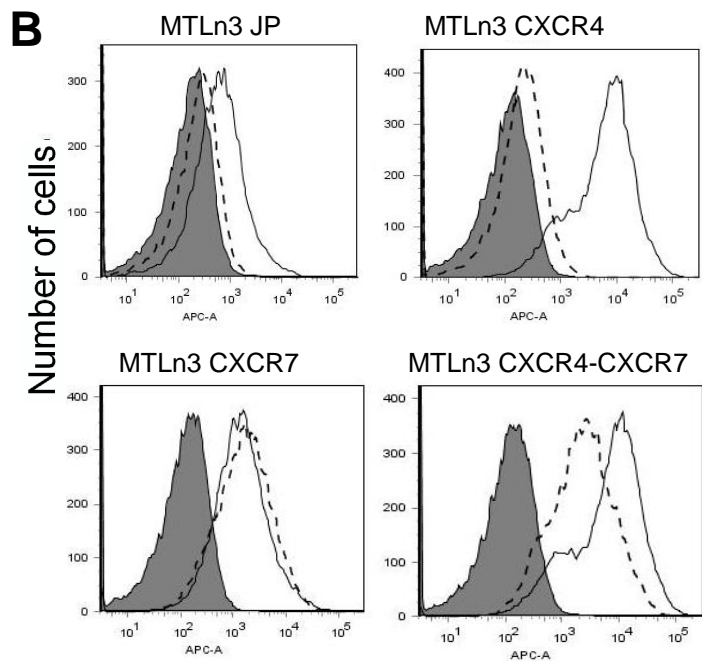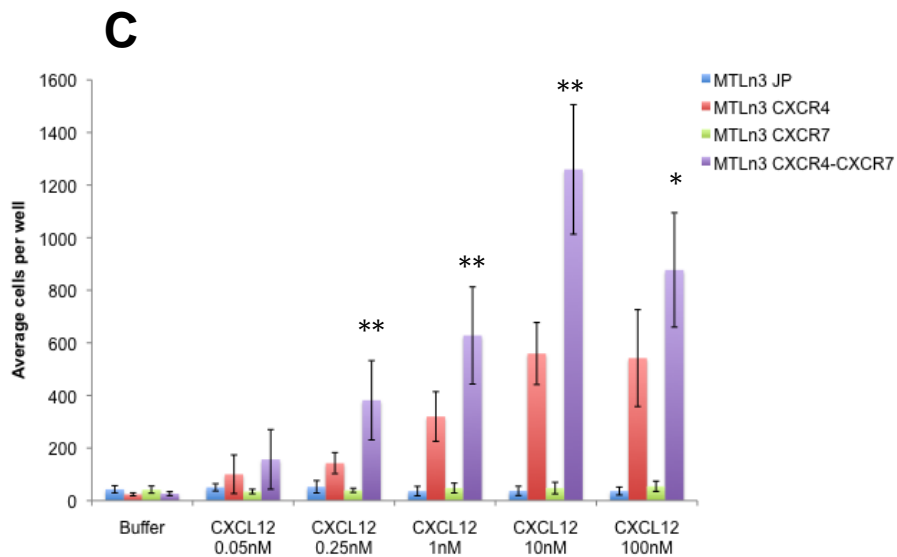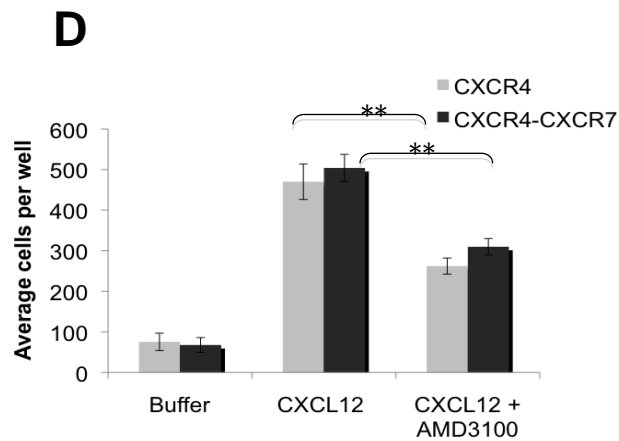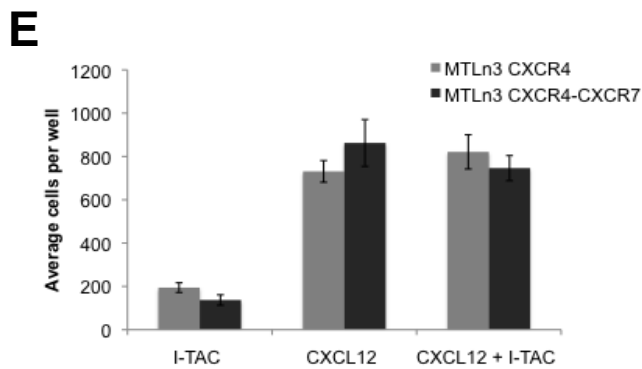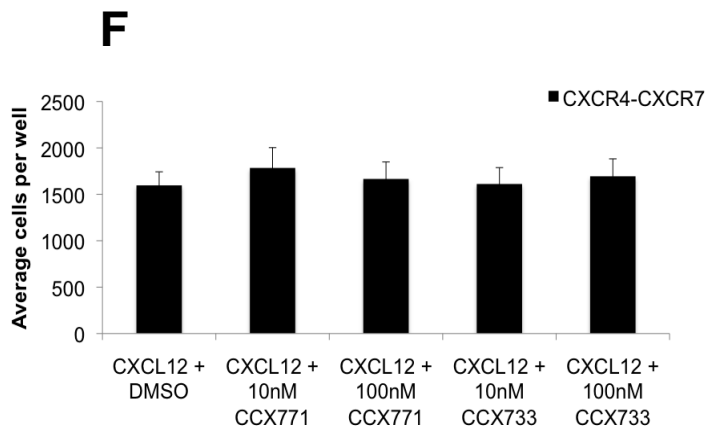

Supplement: MOESM11 [file 9702780]
